# Supplementary material for: Genome-wide Screening to Identify Responsive Regulators Involved in the Virulence of Xanthomonas oryzae pv. oryzae
Source: PubMed Central journal article supplement — Plant Pathol J. 2019 Feb 1;35(1):84–9. doi: 10.5423/PPJ.NT.09.2018.0193 (PMC6385649; doi:10.5423/ppj.nt.09.2018.0193), 2019-02-01
Supplement: ppj-35-084_suppl.pdf [file ppj-35-084_suppl.pdf]

## Supplementary Materials of

# Genome-wide Screening to Identify Responsive Regulators Involved in the Virulence of *Xanthomonas oryzae* pv. *oryzae*

### Supplementary Methods

**Pathogen inoculation and disease evaluation.** *Xoo* strains were cultured for three days on PSA plates containing antibiotics (15 µg/ml cephalixin for PXO99A, 25 µg/ml kanamycin for knock-out mutants, and 10 µg/mL gentamycin for complementary strains) and were suspended to 10<sup>7</sup> cfu (colony forming unit)/ml in water for inoculation using the clipping method (Kauffman et al., 1973). Generally, three healthy, recently and fully developed leaves from each tiller of individuals were chosen for inoculation. Lesion lengths were scored 14 days after inoculation (DAI), and the bacterial population in the inoculated leaves was measured after extraction by colony counting. To collect the bacteria cells from the inoculated leaves, the leaf was detached from the rice, cut into thin slices, suspended, and shaken for 30 min in 10 ml of water containing appropriate antibiotics. After serial dilutions, the supernatant was dropped onto the PSA plate, the plate was cultured at 28°C, and the colonies were counted within three days.

For virulence test, Dong-jin seeds were germinated on petri dishes containing water-drenched filter papers at 28°C for three days, transferred to soil, and then grown in a green house or paddy field before pathogen inoculation. All the inoculation experiments were carried out with six-week-old rice or seven-week-old rice plants (at winter season). Chamber conditions for inoculation test were set at 28°C with 85% humidity for 14 h for days, 25°C and 80% humidity for 10 h for nights.

**Generation of knock-out mutant and complementary strains.** We first cloned RR genes, amplified by PCR with specific primers (Supplementary Table 1), into pGEM-Teasy vector (Promega) and then inserted the kanamycin cassette into each target gene with appropriate restriction enzymes (Table S1). After confirmation by sequencing, the fragments including target RR genes split by the kanamycin cassette were sub-cloned into pUC18 vector and the knock-out constructs were introduced into PXO99A competent cells by electroporation. Generated knock-out strains were selected on PSA plates containing 25 µg/ml kanamycin

and confirmed by PCR as previously reported by Lee et al. (Lee and Ronald, 2007).

To eliminate the polar effect of the RR gene knock-out, we produced the complementary strains continuously expressing target RR proteins with a 6 × His-tag at its N-terminus. Full-length of each RR gene was amplified using the primer set (Table S1), which contained a 6 × His-tag on the forward primer, and cloned into a pGEM-Teasy vector. The 6 × His-RR fragment was sequenced and subcloned into the broad-host-range vector pBBR1-MCS5 using EcoRI–BamHI. The resulting construct was introduced into competent cells of each RR knock-out strain by electroporation, and complementary strains were selected on PSA containing 10 µg/ml gentamycin.

**Protein extraction and western blot analysis.** *Xoo* strains were cultured in 100 ml PSB containing suitable antibiotics until the stationary phase. Cells were harvested by centrifugation (10,000 rpm, 30 min, 4°C), washed with 100 ml distilled water, and harvested again with the same centrifugation conditions. Cell pellets were suspended in 25 ml of lysis buffer (50 mM NaH<sub>2</sub>PO<sub>4</sub>, 300 mM NaCl, 10 mM Imidazole, pH 8.0) containing 20 µl of lysozyme (400,000 U/ml). After incubation overnight at 4°C, cells were sonicated for 5 min (40% AMP, 5 s pulse on, 10 s pulse off) on ice and then centrifuged (12,000 rpm, 30 min, 4°C). The supernatant including total proteins was filtered through a 0.2-µm filter to remove all cell debris. To verify the target protein expression, the total protein extracts were separated by SDS-PAGE and western blot analysis was carried out with His-probe (Novagen) as the primary antibody and HRP-probe (Santa Cruz Biotechnology) as the secondary antibody.

**Growth curves of *Xoo* strains in PSB.** A single colony of each *Xoo* strain was grown in 5 ml of PSB containing suitable antibiotics. When the cultures reached stationary phase, bacteria strains were added to 50 ml of PSB with 15 µg/ml cephalixin to give a starting population of 10<sup>4</sup> cfu/ml. Growth of the bacteria population was measured by colony counting every 12 hrs for 4 days.

## References

Kauffman, H. E., Reddy, A. P. K., Hsieh, S. P. Y. and Merca, S. D. 1973. An improved technique for evaluating resistance of rice varieties to *Xanthomonas oryzae*. *Plant Dis. Rep.* 57:537-

541.

Lee, S. W. and Ronald, P. C. 2007. Marker-exchange mutagenesis and complementation strategies for the Gram-negative bacteria *Xanthomonas oryzae* pv. *oryzae*. *Methods Mol. Biol.* 354:11-18.

**Supplementary Table 1.** Primer sequences used for cloning of 62 RR genes and restriction enzymes used for insertion of the kanamycin cassette

| Gene names | Primer sequence                                                                                                          | Gene size (bp) | Enzyme cut position | Product size (Left/Right) | Restriction enzyme |
|------------|--------------------------------------------------------------------------------------------------------------------------|----------------|---------------------|---------------------------|--------------------|
| RR1        | 5'-GAATTCGATGGCTGCAACGAC-3'<br>5'-CGTCGCACCCGGGGGCTTTGC-3'<br>5'-GCAAAGCCCCGGGTGCGACG-3'<br>5'-GTGTTTCGGCTTCGCGCAATAG-3' | 351bp          | 404bp               | 833bp<br>(403bp/430bp)    | SmaI               |
| RR2        | 5'-GTCCAACGGCACCACCTTCCT-3'<br>5'-TCGTACGTCAGATGCTTAC-3'                                                                 | 1077bp         | 302bp               | 983bp<br>(301bp/682bp)    | MscI               |
| RR3        | 5'-TCTAGAGGCGCATTTTCGACGGATAC-3'<br>5'-GGTACCGTCACAGGACTGCAGGTCAA-3'                                                     | 1062bp         | 735bp,<br>1238bp    | 1347bp<br>(391bp/452bp)   | XbaI/KpnI          |
| RR4        | 5'-TCTAGAAAGCTGCATTCCTGTCCTC-3'<br>5'-GGTACCCGACGGCGTGAAGACGTAA-3'                                                       | 777bp          | 395bp               | 753bp<br>(388bp/364bp)    | BamHI              |
| RR5        | 5'-GATCGATCTGGCCATCCTGG-3'<br>5'-AGATCGTGCTCTTCGGCAAT-3'                                                                 | 2070bp         | 664bp,<br>1081bp    | 1350bp<br>(506bp/428bp)   | BssHII             |
| RR6        | 5'-CTCCATGGATGACGGAAGGATCAGCCTG-3'<br>5'-CTCATATGCCCTGTGGGGTGGCTACGTG-3'                                                 | 1245bp         | 89bp,<br>746bp      | 1022bp<br>(516bp/506bp)   | HincII/PstI        |
| RR7        | 5'-CAAGCGTCAGTTTGGCTACG-3'<br>5'-ACTCAATTGAAGCTGGCCGA-3'                                                                 | 969bp          | 875bp               | 902bp<br>(417bp/484)      | BssHII             |
| RR8        | 5'-GTCTAGAGAATTCGCCGCTTGATTGA-3'<br>5'-GGTACCGCGACGGATCATCGATACCA-3'                                                     | 3396bp         | 2351bp              | 1045bp<br>(480bp/563bp)   | BamHI              |
| RR9        | 5'-TCTAGATTATCCGAGGATGCACTGGC-3'<br>5'-GGTACCCGTGAGCGTTCATGTGCATT-3'                                                     | 603bp          | 288bp               | 981bp<br>(455bp/527bp)    | EcoRV              |
| RR10       | 5'-GTGGCCGTGAAGGAAGTGCTG-3'<br>5'-GAGTCTCGACGGCAGTACTAG-3'                                                               | 537bp          | 383bp               | 885bp<br>(382bp/503bp)    | BssHII             |
| RR11       | 5'-TTCAGGGGAATGCAATGC-3'<br>5'-CGCAACACTCTGTCCAGAT-3'                                                                    | 1647bp         | 963bp               | 1004bp<br>(478bp/1487bp)  | BssHII             |
| RR12       | 5'-CTGCCGCTGTGCGCAAGATCG-3'<br>5'-GGTCGCGTTCATCAGGCGGTC-3'                                                               | 381bp          | 279bp               | 663bp<br>(278bp/385bp)    | BamHI              |
| RR13       | 5'-CTCCATGGTGGCACCCTGACGCTGAAAAG-3'<br>5'-CTCATATGCCATCACCGCCATCCACTCATC-3'                                              | 381bp          | 300bp               | 752bp<br>(299bp/453bp)    | HincII/SalI        |
| RR14       | 5'-AGCGATGGCCACGATGTCT-3'<br>5'-ACTCATGATTTGCCCCGCA-3'                                                                   | 633bp          | 406bp               | 820bp<br>(405bp/415bp)    | BssHII             |
| RR15       | 5'-TCTAGAGCTTTTTGGCGTGAACGTCT-3'<br>5'-GGTACCCTTCGGCGACCACTCTCAG-3'                                                      | 945bp          | 507bp               | 842bp<br>(412bp/430bp)    | BamHI              |
| RR16       | 5'-CGTCGCCTTCAGGAGTTTCT-3'<br>5'-GGGTAGAGCATCTTGACCCG-3'                                                                 | 1650bp         | 539bp,<br>1053bp    | 1340bp<br>(404bp/423bp)   | BssHII             |
| RR17       | 5'-GTCCTGTTGTCTTCCACCAC-3'<br>5'-GTCAATCGATCGAAACCCGCA-3'                                                                | 1524bp         | 870bp,<br>872bp     | 999bp<br>(525bp/473bp)    | BssHII             |
| RR18       | 5'-GGATCCTCTAGAAACAGTTGTTTCGAAACGGC-3'<br>5'-CTCGAGGGTACCTCGATCAACGGCATGTAGGC-3'                                         | 192bp          | 521bp               | 885bp<br>(428bp/456bp)    | EcoRI              |

Continued

**Supplementary Table 1.** Primer sequences used for cloning of 62 RR genes and restriction enzymes used for insertion of the kanamycin cassette

| Gene names | Primer sequence                                                           | Gene size (bp) | Enzyme cut position | Product size (Left/Right) | Restriction enzyme |
|------------|---------------------------------------------------------------------------|----------------|---------------------|---------------------------|--------------------|
| RR19       | 5'-CTTGGCCCAACGGTTAATGC-3'<br>5'-TTCACGGAGATAGGCTGCAC-3'                  | 348bp          | 573bp,<br>787bp     | 986bp<br>(389bp/391bp)    | BssHII             |
| RR20       | 5'-GGCCTGACTTACGAGACCTG-3'<br>5'-GTAGGGCTTTTCCAGGAAGG-3'                  | 330bp          | 334bp               | 551bp<br>(333bp/218bp)    | HincII/PstI        |
| RR21       | 5'-CGGCTTGGTCAGATATTGCT-3'<br>5'-GCGGGAAGTTGTGAAGTAG-3'                   | 402bp          | 578bp               | 967bp<br>(577bp/390bp)    | PstI               |
| RR22       | 5'-CCCTCCAGGAAGTCTTCAG-3'<br>5'-AAAATTGCGGACCAGCAACC-3'                   | 363bp          | 766bp,<br>190bp     | 903bp<br>(442bp/521bp)    | MluI               |
| RR23       | 5'-GAATGGATCACCGAGCATGG-3'<br>5'-TCTCTCCATCATCGACGTCG-3'                  | 3576bp         | 1002bp              | 1542bp<br>(1001bp/541bp)  | MscI               |
| RR24       | 5'-GCCTTGGCTTTCAAAAATGG-3'<br>5'-CACAAGGTGCGATCTGGATA-3'                  | 3558bp         | 321bp               | 903bp<br>(320bp/583bp)    | SmaI               |
| RR25       | 5'-CGTTGGCCCAAGCGTCTCC-3'<br>5'-GCCGAGTGTGCCAGGAACC-3'                    | 2766bp         | 392bp               | 784bp<br>(391bp/393bp)    | BssHII             |
| RR26       | 5'-ATGAACATGGCCACATGCCC-3'<br>5'-TCAATGCAGCAACGCAGCCA-3'                  | 723bp          | 836bp               | 915bp<br>(835bp/80bp)     | PvuII              |
| RR27       | 5'-CTGCGGCCGACCCGGTATTGGCCGACGCC-3'<br>5'-CTCATATGTCGCTAGGATGGCACGCGTC-3' | 792bp          | 44bp,<br>641bp      | 1000bp<br>(500bp/500bp)   | HincII/PstI        |
| RR28       | 5'-AGCCTCTTCCGACCGTAG-3'<br>5'-GCGACAACAGTCAGGCATC-3'                     | 678bp          | 388bp               | 1001bp<br>(387bp/614bp)   | MscI               |
| RR29       | 5'-TGCCAAGCTAGTGAGCAGAC-3'<br>5'-CGTGCATCGAACATCTCACC-3'                  | 699bp          | 438bp               | 850bp<br>(437bp/413bp)    | BamHI              |
| RR30       | 5'-GAAGCTTCTGTTCCGTTTCCCACAGGA-3'<br>5'-GTCTAGAGAACGCAGACCGATGGGAT-3'     | 2646bp         | 1663bp              | 974bp<br>(480bp/493bp)    | SaII               |
| RR31       | 5'-TCACTCAGGACGAACTGCAC-3'<br>5'-GCTGGAAGCACGCAGATTTC-3'                  | 657bp          | 766bp,<br>946bp     | 1099bp<br>(473bp/447bp)   | MscI               |
| RR32       | 5'-CAGGTGCATGTCTGAATCACG-3'<br>5'-CTAGATACAGCAGCAAGGTGC-3'                | 702bp          | 480bp               | 998bp<br>(479bp/519bp)    | HincII             |
| RR33       | 5'-CGGATTTATCCACCCGCTGA-3'<br>5'-ATGGAAGGCGTTAGCACGAA-3'                  | 690bp          | 858bp               | 964bp<br>(408bp/470bp)    | BssHII             |
| RR34       | 5'-CTGACACCGGAAGTTCTGCT-3'<br>5'-CTCAGCAAGTCCCAGCAAC-3'                   | 1116bp         | 390bp               | 543bp<br>(352bp/191bp)    | BssHII             |
| RR35       | 5'-CTGCAGCGGGTTTCAGGCAGAGAAGT-3'<br>5'-GAGCTCGTCGAATTGAAGGTGCCAGC-3'      | 387bp          | 740bp               | 1010bp<br>(559bp/451bp)   | SaII               |
| RR36       | 5'-GAAGCTTGAATAGACGCGCGGCATTGA-3'<br>5'-GTCTAGAGCACGTTCTGGTCGTTGT-3'      | 3453bp         | 1489bp              | 937bp<br>(452bp/484bp)    | SaII               |
| RR37       | 5'-GCAGATTCTTTTCGGCGGTG-3'<br>5'-AACCGCTGAACGTAGACAGT-3'                  | 672bp          | 566bp               | 947bp<br>(534bp/412bp)    | BssHII             |
| RR38       | 5'-GTGAGCGGACCATCATTC-3'<br>5'-TCAGAGCACCGCGCTCGTGA -3'                   | 1827bp         | 119bp<br>447bp      | 635bp<br>(355bp/280bp)    | SfoI               |
| RR39       | 5'-CTGCAGTGGTTGAACTTGCCACCGAT-3'<br>5'-GGATCCAGATAACGCAGCAGCGACTT-3'      | 1280bp         | 543bp               | 937bp<br>(487bp/451bp)    | BssHII             |

Continued

**Supplementary Table 1.** Primer sequences used for cloning of 62 RR genes and restriction enzymes used for insertion of the kanamycin cassette

| Gene names | Primer sequence                                                          | Gene size (bp) | Enzyme cut position | Product size (Left/Right) | Restriction enzyme |
|------------|--------------------------------------------------------------------------|----------------|---------------------|---------------------------|--------------------|
| RR40       | 5'-CCTCGTCCAGCAACTGGC -3'<br>5'-GAACGTCCCGGCGATACTG -3'                  | 381bp          | 650bp               | 833bp<br>(547bp/258bp)    | BssHII             |
| RR41       | 5'-GAACAGGCTCATGAACGGCT-3'<br>5'-GCCATCGTGTCCAATTTCCC-3'                 | 498bp          | 569bp               | 892bp<br>(352bp/520bp)    | BssHII             |
| RR42       | 5'-GACACCGTCGGCCCGTCACC-3'<br>5'-TGTCGGTGGTGCAAAGCATC-3'                 | 729bp          | 96bp                | 244bp<br>(119bp/125bp)    | SmaI               |
| RR43       | 5'-GAAGCTTCCCTTGTAGGTGGTGTGTCC-3'<br>5'-GTCTAGACACAACATCGATGCCGTTT-3'    | 2037bp         | 1491bp              | 902bp<br>(463bp/438bp)    | HincII             |
| RR44       | 5'-CATCTGCAGCACGCGAAATTG-3'<br>5'-GACCTGCTGTTGATGGACCTC-3'               | 669bp          | 179bp<br>276bp      | 892bp<br>(447bp/445bp)    | BssHII             |
| RR45       | 5'-TCTAGAGCCATAACGTTTTACCCCTG-3'<br>5'-GGTACCTTGACGCAGGTCTTCCAACG-3'     | 1395bp         | 512bp,<br>787bp     | 1131bp<br>(367bp/488bp)   | BssHII             |
| RR46       | 5'-TCCACCAGATCTCAAACACC-3'<br>5'-GTGACCGCTGATCCTCCAG-3'                  | 795bp          | 184bp<br>681bp      | 917bp<br>(542bp/375bp)    | BssHII             |
| RR47       | 5'-CACTGGGCGTTGACGCATGG-3'<br>5'-CATGCAGATCCTGTGCGCCGCAC-3'              | 708bp          | 556bp               | 635bp<br>(555bp/80bp)     | SmaI               |
| RR48       | 5'-ACTGGATCATCTGTTTTTCC-3'<br>5'-ATCATCTGGTCAAGCCGGTG-3'                 | 1347bp         | 399bp               | 830bp<br>(398bp/432bp)    | BssHII             |
| RR49       | 5'-CTCCATGGCAGCCGCTGGTCGAAAATGC-3'<br>5'-CTCATATGCGGAGCGTGGTCATTCCAGC-3' | 738bp          | 401bp               | 900bp<br>(400bp/500bp)    | HincII             |
| RR50       | 5'-TCTAGACAATGCCGTCAGTACAGCG-3'<br>5'-GGATCCATGCTCAGATCCGACAGCAC-3'      | 441bp          | 896bp               | 965bp<br>(448bp/516bp)    | NcoI               |
| RR51       | 5'-TCTAGAGCCGAATCGATGTTGTCGTT-3'<br>5'-GGTACCTTTGCGCAATACATGCACCG-3'     | 1503bp         | 1133bp              | 840bp<br>(526bp/313bp)    | MscI               |
| RR52       | 5'-ACCCGCCGCTGCAGCGTTAC-3'<br>5'-GTGCTTGAGCAGCAGTGCAGC-3'                | 717bp          | 485bp               | 964bp<br>(484bp/480bp)    | HincII             |
| RR53       | 5'-GTCGATGGCGCGTTCGTAGACG-3'<br>5'-ACGTGGCGGAGATGCGCTCTG-3'              | 720bp          | 585bp               | 954bp<br>(584bp/370bp)    | HincII             |
| RR54       | 5'-CGCATAACGCTGGCCAAATTGT-3'<br>5'-ACCGCAGGATCTCGGTCTCG-3'               | 642bp          | 497bp               | 959bp<br>(496bp/463bp)    | HincII             |
| RR55       | 5'-CTCCATGGTTTTTCGGCGTACAACTCGC-3'<br>5'-CTCATATGTCGGAATTCAGCAACGAGCG-3' | 717bp          | 64bp,<br>356bp      | 1000bp<br>(500bp/500bp)   | BssHII             |
| RR56       | 5'-TCTAGACTCGAAGGTGTCCAGCAGTT-3'<br>5'-GGTACCAACGCGCTCAAGTTCAATCG-3'     | 831bp          | 539bp,<br>724bp     | 1064bp<br>(400bp/400bp)   | BssHII             |
| RR57       | 5'-CGAACCGCAGCACAGTGAACC-3'<br>5'-TGCAATCCCACGAGGCAATCG-3'               | 465bp          | 466bp               | 919bp<br>(465bp/454bp)    | HincII             |
| RR58       | 5'-GCGCTGGAGTCGCGTAATTCGC-3'<br>5'-CCTGCTCTACCTGCAACGCAGC-3'             | 690bp          | 466bp               | 760bp<br>(465bp/296bp)    | BamHI              |
| RR59       | 5'-TGATGCAACTCAGCCGCAGC-3'<br>5'-CCTTCGGCAACGGCAGTGAG-3'                 | 1284bp         | 404bp               | 790bp<br>(403bp/387bp)    | BssHII             |
| RR60       | 5'-CCGCAGGCGTATCTCAAACG-3'<br>5'-GCGGTGAGCACTTCTCCAGG-3'                 | 1122bp         | 465bp               | 955bp<br>(464bp/491bp)    | EcoRV              |
| RR61       | 5'-GCGCTGGAGTCGCGTAATTCGC-3'<br>5'-CCTGCTCTACCTGCAACGCAGC-3'             | 690bp          | 466bp               | 761bp<br>(465bp/296bp)    | BamHI              |
| RR62       | 5'-TCTTGTTCAGCGTTTTCT-3'<br>5'-CGAAGACGACCAGATCAGC-3'                    | 1401bp         | 549bp               | 995bp<br>(548bp/447bp)    | HincII             |

**Supplementary Table 2.** Complementary strains used in this study

| Strains | Locus tag No. of mutated gene | Characteristics                                                                                            | Source        |
|---------|-------------------------------|------------------------------------------------------------------------------------------------------------|---------------|
| RR13C   | PXO_RS11975/<br>PXO_RS12905   | Km <sup>r</sup> , Gm <sup>r</sup> , RR13 complemented with pBBR1-MCS5 inserted by <i>6XHis-PXO_RS11975</i> | in this study |
| RR35C   | PXO_RS20535                   | Km <sup>r</sup> , Gm <sup>r</sup> , RR35 complemented with pBBR1-MCS5 inserted by <i>6XHis-PXO_RS20535</i> | in this study |
| RR39C   | PXO_RS21800                   | Km <sup>r</sup> , Gm <sup>r</sup> , RR39 complemented with pBBR1-MCS5 inserted by <i>6XHis-PXO_RS21800</i> | in this study |
| RR51C   | PXO_RS04305                   | Km <sup>r</sup> , Gm <sup>r</sup> , RR51 complemented with pBBR1-MCS5 inserted by <i>6XHis-PXO_RS04305</i> | in this study |
| RR54C   | PXO_RS06090                   | Km <sup>r</sup> , Gm <sup>r</sup> , RR54 complemented with pBBR1-MCS5 inserted by <i>6XHis-PXO_RS06090</i> | in this study |

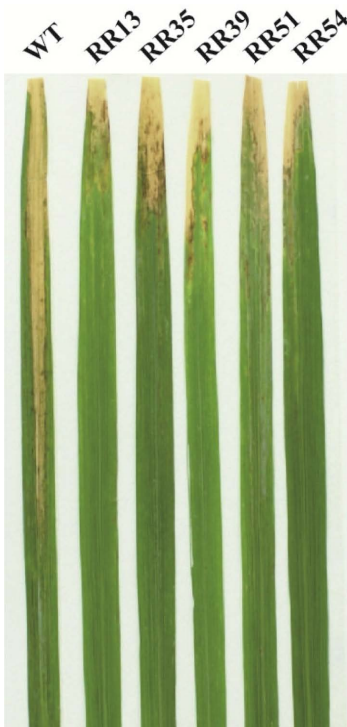

**Supplementary Fig. 1.** Virulence phenotypes of PXO99A (WT), RR13, RR35, RR39, RR51 and RR54 strains.

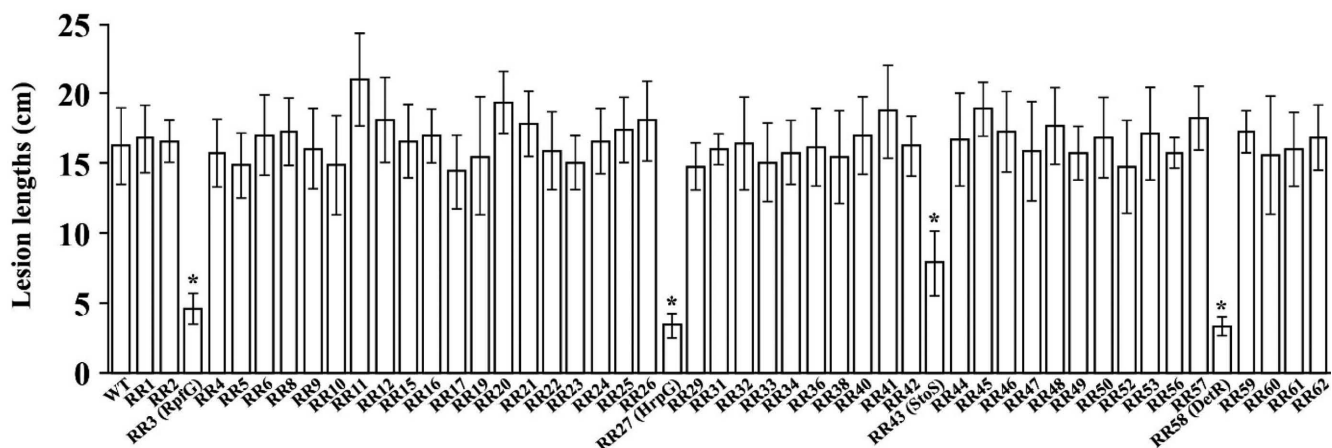

**Supplementary Fig. 2.** Inoculation test with PXO99A and RR mutant strains. A high population density of each mutant strain was inoculated on leaves of Dong-jin rice plants, and the lesion lengths were scored at 14 days after inoculation. Each strain was cultured on PSA containing cephalixin (for PXO99A) and kanamycin (for mutant strains) at 28°C for 3 days. The bacteria were suspended in distilled water to achieve a population of  $10^7$  cfu/ml and inoculated using the clipping method. To prepare the rice plants, Dong-jin seeds were germinated in water at 28°C for 4 days and then planted into soil and grown for 6 weeks in a greenhouse. The 6-week-old plants were transferred to a growth chamber at least 2 days prior to inoculation. The chamber conditions were as follows: 14/10 h of light/dark at 28/25°C and 80/90% relative humidity. \* indicates that the lesion length of mutant strains was significantly different from that of PXO99A by Duncan's test ( $P < 0.05$ ). The virulence tests were repeated three times with high consistency. The results from one experiment are shown.

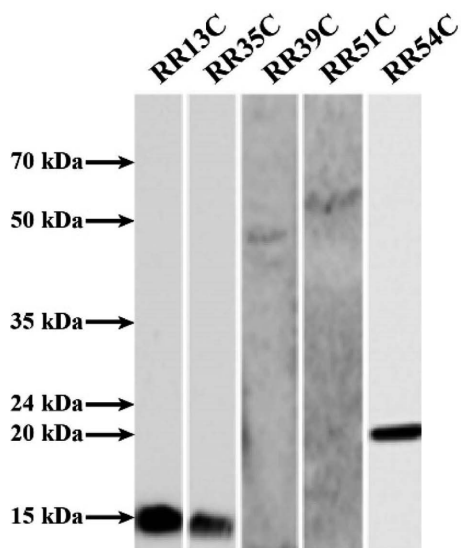

**Supplementary Fig. 3.** Western blot analysis of the complementary strains RR13C, RR35C, RR39C, RR51C, and RR54C, which continuously express 6×His-PXO\_RS11975, -PXO\_RS20535, -PXO\_RS21800, -PXO\_RS04305, and -PXO\_RS06090 recombinant proteins, respectively. Bacteria were harvested at stationary phase. Total proteins were extracted from 100 ml of culture by sonication, and western blot analysis following SDS-PAGE was carried out with His-probe (Novagen) as the primary antibody and HRP-probe (Santa Cruz Biotechnology) as the secondary antibody.

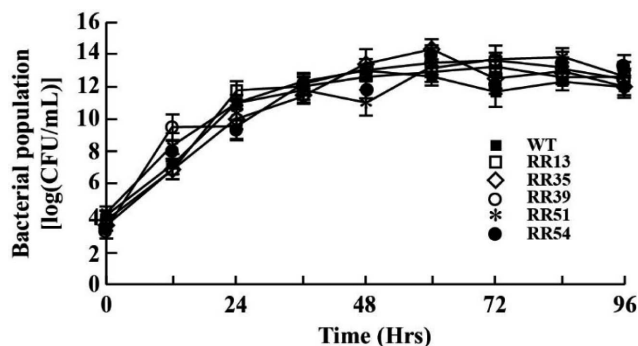

**Supplementary Fig. 4.** Growth curves of PXO99A, RR13, RR35, RR39, RR51, and RR54 in PSB. Bacteria were cultured in 50 ml PSB with an initial population of approximately  $10^4$  cfu/ml. Samples were collected every 12 h to count the bacterial population. The experiments were repeated three times with the same result, and the results from one experiment are presented.
